# Supplementary material for: Improved silicon nanowire field-effect transistors for fast protein–protein interaction screening
Source: Royal Society of Chemistry journal article supplement (doi:10.1039/c2lc40772h), 2012-10-31

Improved Silicon Nanowire Field-effect Transistors for Fast Protein-protein  
Interaction Screening

(Supplementary Information)

Ti-Yu Lin<sup>a</sup>, Bor-Ran Li<sup>b,c</sup>, Sheng-Ta Tsai<sup>d</sup>, Chien-Wei Chen<sup>b,c</sup>, Chung-Hsuan  
Chen<sup>d</sup>, Yit-Tsong Chen<sup>b,c,\*</sup>, and Chien-Yuan Pan<sup>a,e,\*</sup>

<sup>a</sup>Institute of Zoology, National Taiwan University, Taipei, Taiwan

<sup>b</sup>Department of Chemistry, National Taiwan University, Taipei, Taiwan

<sup>c</sup>Institute of Atomic and Molecular Sciences, Academia Sinica, Taipei, Taiwan

<sup>d</sup>Genomics Research Center, Academia Sinica, Taipei, Taiwan

<sup>e</sup>Department of Life Science, National Taiwan University, Taipei, Taiwan

**\* CORRESPONDING AUTHORS**

Dr. YT Chen, Department of Chemistry, National Taiwan University and Institute of Atomic and Molecular Sciences, Academia Sinica, P.O. Box 23-166, Taipei 106, Taiwan; E-mail: ytcchem@ntu.edu.tw, Fax: (+886) 2-2363-6359

Dr. CY Pan, Institute of Zoology and Department of Life Science, National Taiwan University, 1 Sec. 4, Roosevelt Road, Taipei 106, Taiwan; E-mail: cypan@ntu.edu.tw, Fax: (+886) 2-2363-6837

Table S1. CalnI-interacting candidates

| Classification             | Accession no.<br>(Swiss-Prot) | Protein description                  | pI   | Sequence<br>coverage (%) | Mean error<br>(ppm) | Cellular role                      |
|----------------------------|-------------------------------|--------------------------------------|------|--------------------------|---------------------|------------------------------------|
| Cytoskeletal<br>regulation | P60711                        | $\alpha$ -actin                      | 5.29 | 42.9                     | 1                   | Cytoskeletal protein               |
|                            | P45592                        | Cofilin-1                            | 8.22 | 15.7                     | <1                  | Actin-depolymerizing factor        |
|                            | Q7M0E3                        | Destrin                              | 7.30 | 8.2                      | 1                   | Actin-depolymerizing factor        |
|                            | Q68FP1                        | Gelsolin                             | 5.76 | 2.2                      | <1                  | Actin-depolymerizing factor        |
| Vesicle<br>transportation  | Q07936                        | Annexin A2                           | 7.55 | 20.4                     | <1                  | Calcium-regulated membrane-binding |
|                            | P07150                        | Annexin A1                           | 6.97 | 8.1                      | <1                  | Calcium/phospholipid-binding       |
|                            | Q6B345                        | Protein S100-A11                     | 5.61 | 21.4                     | 2                   | Ca <sup>2+</sup> binding           |
| Protein folding            | Q07439                        | Heat shock 70 protein<br>1A/1B       | 5.61 | 11.4                     | <1                  | Molecular chaperone                |
|                            | P63018                        | Heat shock cognate 71<br>kDa protein | 5.37 | 5.6                      | <1                  | Molecular chaperone                |

|                     |        |                                       |      |      |    |                                                                       |
|---------------------|--------|---------------------------------------|------|------|----|-----------------------------------------------------------------------|
| Signal transduction | P04785 | Protein disulfide-isomerase           | 4.82 | 3.1  | <1 | Catalyzes the rearrangement of disulfide bonds                        |
|                     | P42930 | Heat shock protein beta-1             | 6.12 | 4.9  | <1 | Molecular chaperone                                                   |
|                     | P10111 | Peptidyl-prolyl cis-trans isomerase A | 8.34 | 8.5  | <1 | Catalyzes the cis-trans isomerization of proline imidic peptide bonds |
|                     | P63102 | 14-3-3 protein zeta/delta             | 4.73 | 16.3 | <1 | Adapter protein                                                       |
|                     | P68511 | 14-3-3 protein eta                    | 4.81 | 6.5  | 2  | Adapter protein                                                       |
|                     | P38983 | 40S ribosomal protein SA              | 4.80 | 14.9 | 2  | Receptor for laminin                                                  |
| Glycolysis          | P09527 | Ras-related protein Rab-7a            | 6.80 | 6.4  | <1 | Small GTPase signaling                                                |
|                     | P04764 | $\alpha$ -enolase                     | 6.16 | 10.6 | <1 | Glycolytic enzyme                                                     |
|                     | P48500 | Triosephosphate isomerase             | 6.89 | 11.2 | 1  | Glycolytic enzyme                                                     |
|                     | P04642 | L-lactate dehydrogenase A chain       | 8.45 | 8.1  | 1  | Glycolytic enzyme                                                     |
|                     | P25113 | Phosphoglycerate mutase 1             | 6.67 | 8.3  | 1  | Glycolytic enzyme                                                     |

|                      |        |                                       |      |      |    |                                                                   |
|----------------------|--------|---------------------------------------|------|------|----|-------------------------------------------------------------------|
| Protein biosynthesis | P05197 | Elongation factor 2                   | 6.41 | 4.3  | 2  | Catalyzes ribosomal translocation during translation elongation   |
|                      | P62630 | Elongation factor 1-alpha 1           | 9.10 | 7.6  | 1  | Promotes the binding of aminoacyl-tRNA to the A-site of ribosomes |
| Others               | Q6P0K8 | Junction plakoglobin                  | 5.75 | 26.3 | 1  | Desmosome protein                                                 |
|                      | P62982 | Ubiquitin-40S ribosomal protein S27a  | 9.68 | 10.3 | <1 | Proteolysis                                                       |
|                      | P55053 | Fatty acid-binding protein, epidermal | 6.73 | 6.7  | 1  | Lipid binding                                                     |

---

Neuronal cell lysate was passed through the CalnIΔHT modified SiNW-FET in the presence of Ca<sup>2+</sup> and the bound proteins were eluted for MS analysis. Proteins with sequence coverage of > 2% and a mean error of < 2% are listed and classified into 7 categories. The pIs and brief descriptions of functions are provided.

Table S2. Nonspecific binding of the neuronal lysate to the GST/SiNW-FET device.

| Accession no.<br>(Swiss-Prot) | Protein description          | pI   | Sequence<br>coverage (%) | Mean error<br>(ppm) |
|-------------------------------|------------------------------|------|--------------------------|---------------------|
| P68370                        | Tubulin $\alpha$ 1A chain    | 4.94 | 10.6                     | 0                   |
| P06302                        | Prothymosin $\alpha$         | 3.75 | 25.9                     | <1                  |
| P69897                        | Tubulin $\beta$ 5 chain      | 4.78 | 6.8                      | <1                  |
| P02091                        | Hemoglobin subunit $\beta$ 1 | 7.88 | 15.6                     | <1                  |
| P15865                        | Histone H1.2                 | 11.1 | 7.3                      | 1                   |
| P63312                        | Thymosin $\beta$ 10          | 5.31 | 31.8                     | 1                   |
| P62161                        | CaM                          | 4.09 | 8.7                      | 1                   |
| P62329                        | Thymosin $\beta$             | 5.02 | 31.8                     | 1                   |

The molecules in the neuronal lysate that was bound onto the GST/SiNW-FET were eluted and used for MS analysis. Proteins with sequence coverage of > 2% and mean errors of < 2% are listed. pI: isoelectric point

**Figure S1.** The MS fragmentation spectra of the eluted GST-CaM, GFP-CaMKII $\alpha$ , and GST-CalnI $\Delta$ HT.

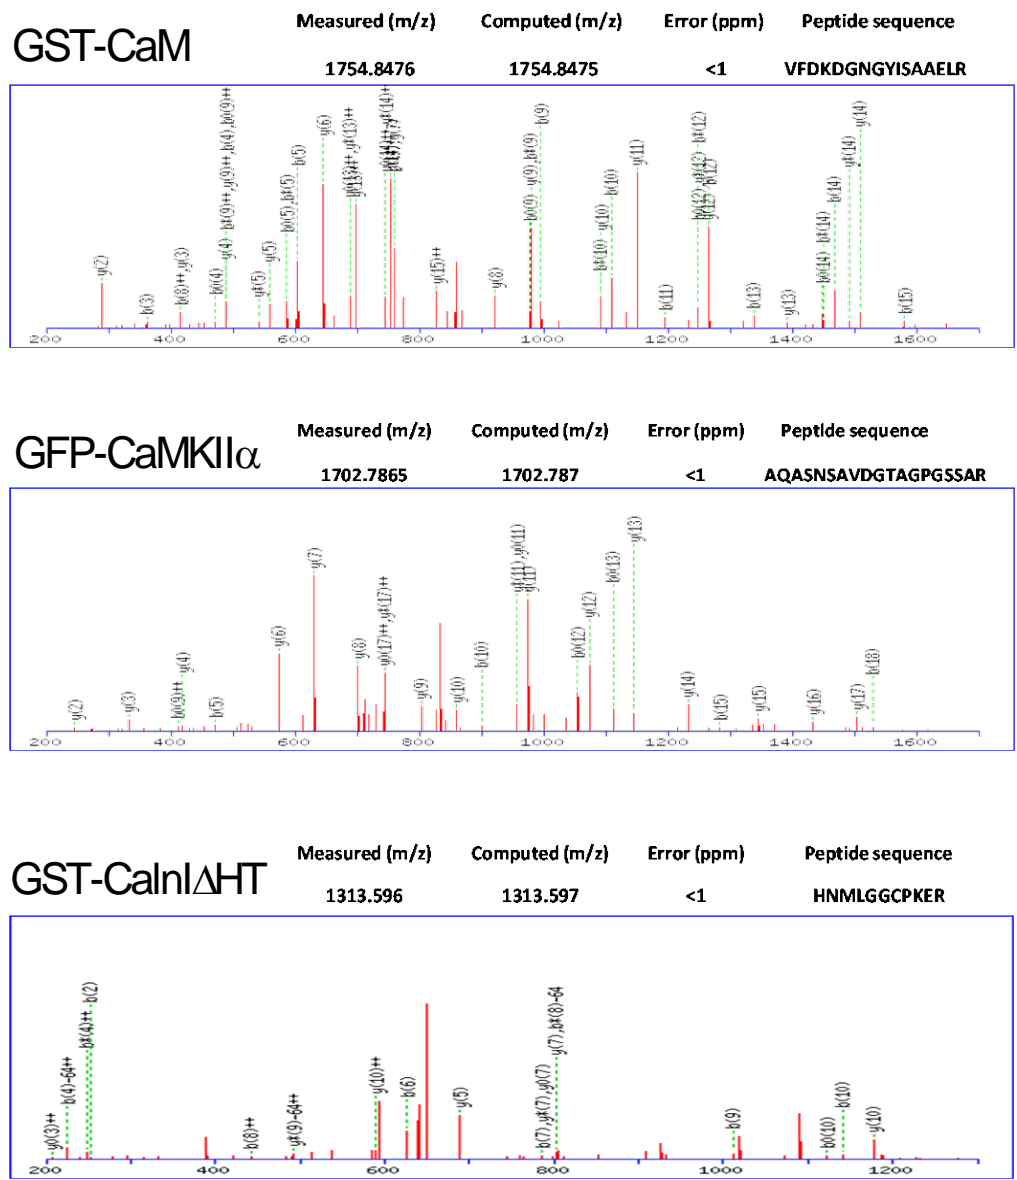

**Figure S2.** A GST/SiNW-FET did not respond to the neuronal cell lysate in the presence of  $\text{Ca}^{2+}$ .

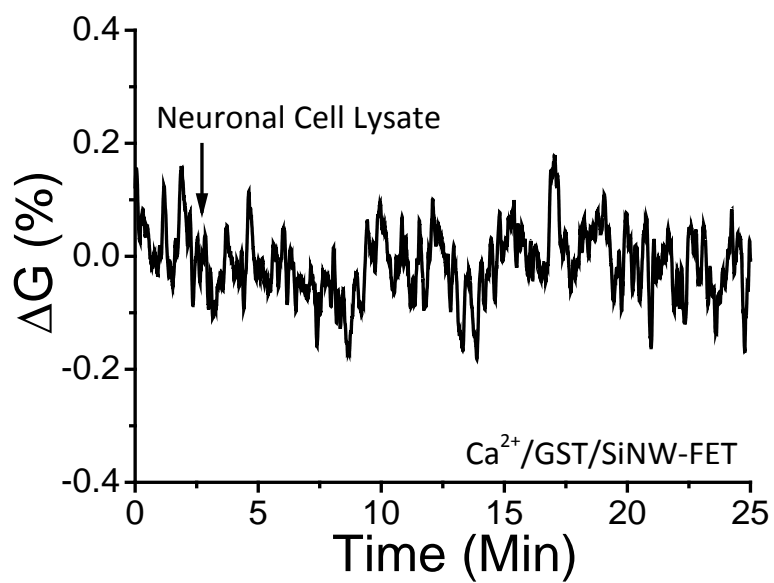

**Figure S3.** CalnI did not interact with the denatured Hsp70. Denatured Hsp70, which was boiled in water for 10 min, had no effect on the electrical conductance of the  $\text{Ca}^{2+}$ /CalnI $\Delta$ HT/SiNW-FET. After replacing the denatured Hsp70 with native Hsp70, an increase in the conductance was observed.

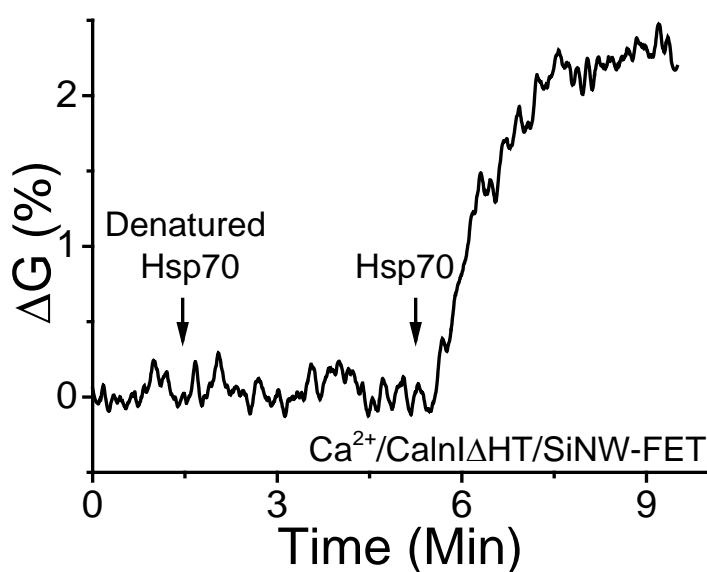

Supplement: c2lc40772h.pdf [file c2lc40772h.pdf]
